# Supplementary material for: Interactions between the PDZ domains of Bazooka (Par-3) and phosphatidic acid: in vitro characterization and role in epithelial development
Source: PubMed Central journal article supplement — Mol Biol Cell. 2012 Sep 15;23(18):3743–53. doi: 10.1091/mbc.E12-03-0196 (PMC3442420; doi:10.1091/mbc.e12-03-0196), 2012-09-15
Supplement: supp_E12-03-0196v1_CombinedSupMats.pdf [file supp_E12-03-0196v1_CombinedSupMats.pdf]

## Supplementary materials

**Supplementary Table 1.** Primers and vectors used for cloning GST-fusion proteins.

| <b>Construct</b> | <b>Vector</b> | <b>Primers</b>                                                     |
|------------------|---------------|--------------------------------------------------------------------|
| GST-PDZ1         | pGEX-6P-3     | gacatatcagcagaattctcatcatgctgg<br>ggccacctgcctcgaggtgctcacggagca   |
| GST-PDZ2         | pGEX-6P-2     | gagagttcgaattctgcgcggtg<br>ttttgtaccggaactcagtcatggagctgc          |
| GST-PDZ3         | pGEX-6P-1     | agttccggtacaagaattcagcagcgcac<br>gccgctaccactcagttgctagccaccgctac  |
| GST-PDZ1-3       | pGEX-6P-3     | gacatatcagcagaattctcatcatgctgg<br>gccgctaccactcagttgctagccaccgctac |
| GST-PDZ1-2       | pGEX-6P-3     | gacatatcagcagaattctcatcatgctgg<br>ttttgtaccggaactcagtcatggagctgc   |
| GST-PDZ2-3       | pGEX-6P-2     | gagagttcgaattctgcgcggtg<br>gccgctaccactcagttgctagccaccgctac        |

**Supplementary Table 2.** List of mutations made and primers used.

**PDZ2 (N452E, P518K) mutations**

|               |                          |
|---------------|--------------------------|
| BazN452E (f)  | gaagggacccgagggctctgggc  |
| BazN452E (rc) | gccagaccctcgggtcccttc    |
| BazP518K (f)  | gaggggcatgaaggcgggagcaac |
| BazP518K (rc) | gttgctcccgccttcagcccctc  |

**PDZ2 4A mutations**

|               |                              |
|---------------|------------------------------|
| BazR515A (f)  | ggcaatcttggcaggcatccagc      |
| BazR515A (rc) | gctggcatgcctgccaagattgcc     |
| BazK449A (f)  | ccaaattatgctcaaggcaggaccaacg |
| BazK449A (rc) | cgttgggtcctgccttgagcataattgg |
| BazR441A (f)  | cgtaaactgggcgcgaaaatcc       |
| BazR441A (rc) | ggattttcgcgccagttfacg        |
| BazR529A (f)  | gtggtctccgccagcaggag         |
| BazR529A (rc) | ctctgctgggcggagaccac         |

**PDZ3 3A mutations**

|               |                                |
|---------------|--------------------------------|
| BazR686A (f)  | cccgcgatggtgccttgcggatgaatgac  |
| BazR686A (rc) | gatcattcatccgcaaggcaccatcgcggg |
| BazR688A (f)  | cccgcgatggtgccttggccatgaatgac  |
| BazR688A (rc) | gatcattcatggccaagcaccatcgcggg  |
| BazR734A (f)  | cctgctgtaggcgcgaagatcttgcg     |
| BazR734A (rc) | cgcaagatcttcgcgcctaccagcagg    |
